# Supplementary material for: Stormwater applications of zeolite-coated biofilm carriers for ammonium removal with possible applications to PFAS biotransformation
Source: Royal Society of Chemistry journal article supplement (doi:10.1039/d3ew00101f), 2023-01-01
Supplement: d3ew00101f1.pdf [file d3ew00101f1.pdf]

1 **Supplemental Information for Stormwater applications of zeolite-**  
2 **coated biofilm carriers for ammonium and PFAS removal**

3  
4

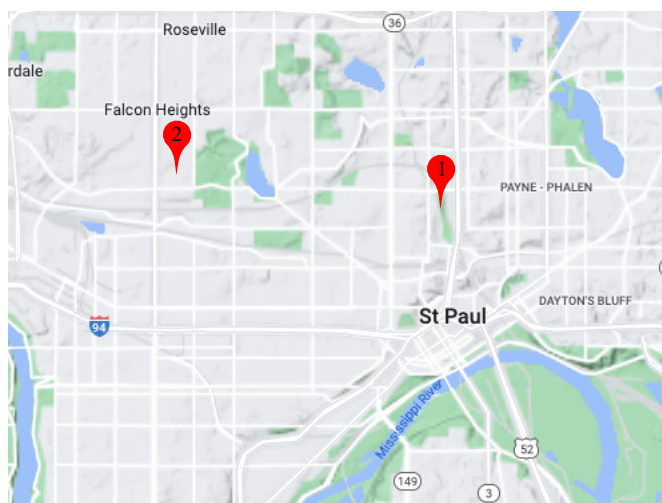

5 **Figure S1. Locations of the stormwater systems in which the carriers were deployed.**

6 The number 1 indicates the Maryland stormwater pond and the number 2 indicates the

7 South Pascal raingarden. Map generated by Google Maps.

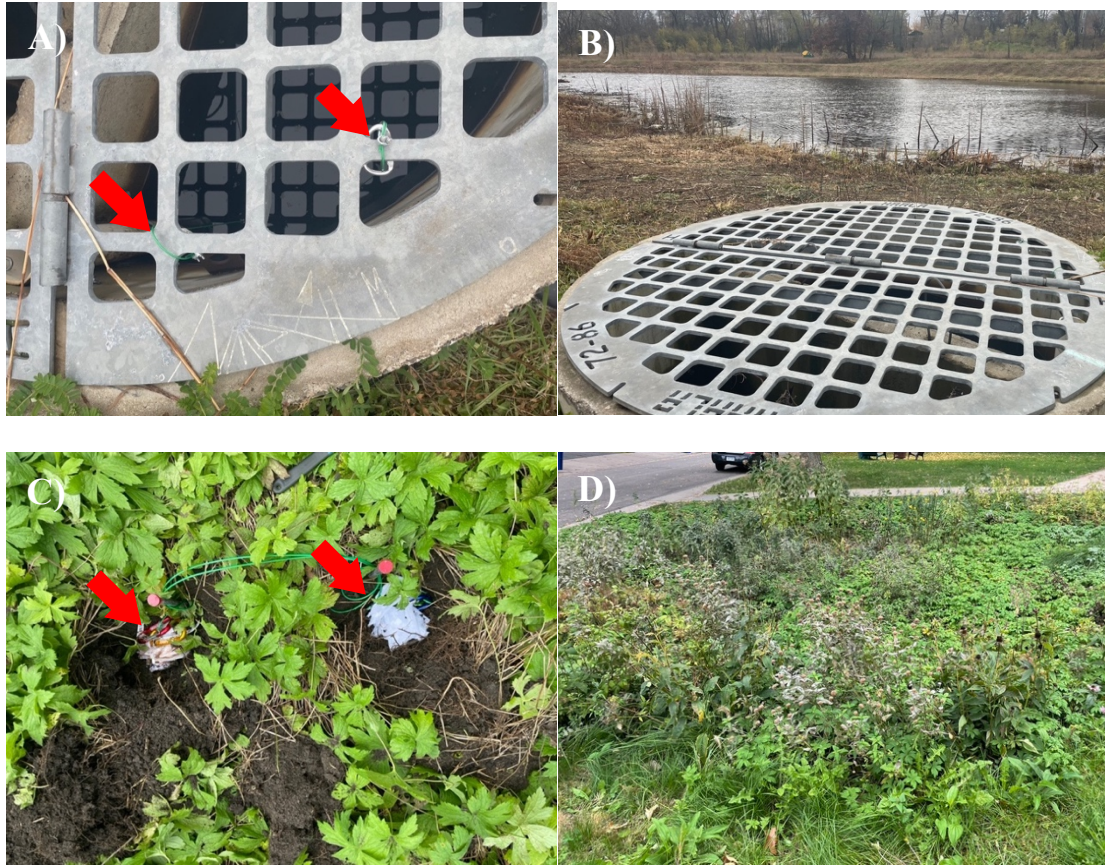

8 **Figure S2. Images of the carrier installation field sites.** The panels show the following: A)  
9 carrier installation at the outlet control box of the Maryland stormwater pond, B) the  
10 Maryland stormwater pond, C) installation of carriers at the South Pascal raingarden where  
11 carriers were covered with 4 inches of soil, and D) the South Pascal raingarden. Red arrows  
12 indicate location of carriers when deployed.  
13

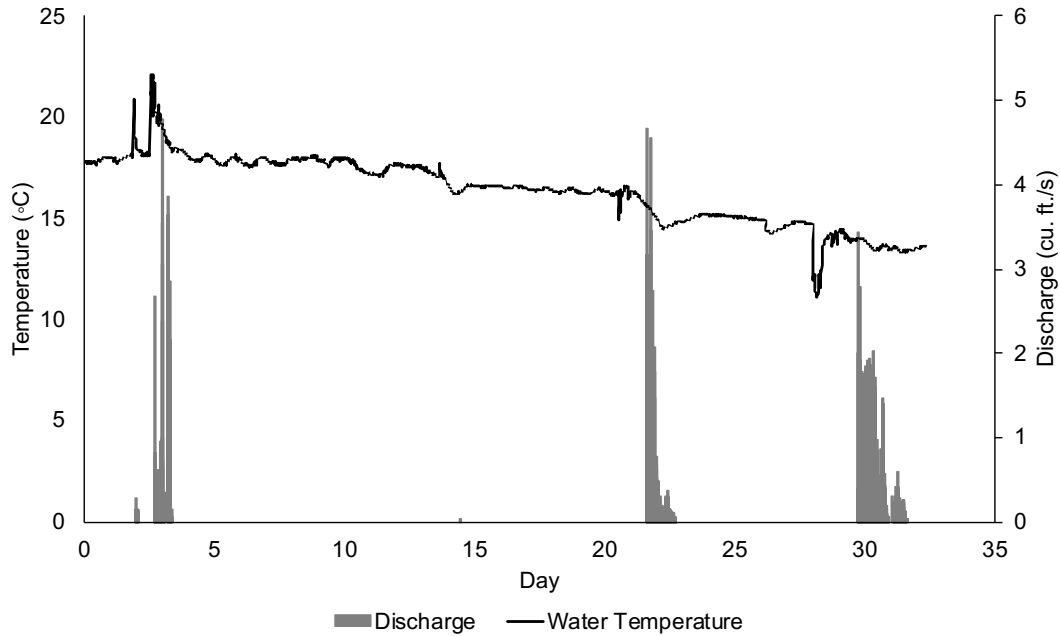

14 **Figure S3. Temperature and discharge at the Maryland stormwater pond.** Records  
 15 were collected from the CRWD website from September 30 (date of deployment) to  
 16 November 1.(40)

17  
 18 **Table S1. Regression analysis of log gene copies with time for carriers deployed in the**  
 19 **raingarden**

| Gene (log copies) | Carrier Type            | Slope (log copies per day) | P-value    | Lower 95%  | Upper 95%  |
|-------------------|-------------------------|----------------------------|------------|------------|------------|
| 16S rRNA          | Control (C)             | 0.00043007                 | 0.88104247 | -0.0054033 | 0.00626344 |
|                   | Control Pre-seeded (CP) | -0.0127703                 | 2.5734E-06 | -0.0167517 | -0.008789  |
|                   | Zeolite (Z)             | 0.00410123                 | 0.06005286 | -0.0001856 | 0.00838809 |
|                   | Zeolite Pre-seeded (ZP) | -0.0032727                 | 0.30241995 | -0.009749  | 0.00320358 |
| Amx               | Control (C)             | 0.00850041                 | 0.3748314  | -0.010807  | 0.0278078  |
|                   | Control Pre-seeded (CP) | -0.0095339                 | 0.04671165 | -0.0189133 | -0.0001545 |
|                   | Zeolite (Z)             | 0.00632947                 | 0.61601833 | -0.0192354 | 0.03189436 |
|                   | Zeolite Pre-seeded (ZP) | 0.01099261                 | 0.13285336 | -0.0036781 | 0.02566331 |

|             |                         |            |            |            |            |
|-------------|-------------------------|------------|------------|------------|------------|
| <i>amoA</i> | Control (C)             | 0.01160085 | 0.02522742 | 0.00155044 | 0.02165126 |
|             | Control Pre-seeded (CP) | -0.0140843 | 0.00110099 | -0.0217136 | -0.006455  |
|             | Zeolite (Z)             | 0.00626229 | 0.18575445 | -0.0031937 | 0.01571827 |
|             | Zeolite Pre-seeded (ZP) | 0.00010092 | 0.98410271 | -0.010393  | 0.01059481 |

20

21 **Table S2. Regression analysis of log gene copies with time for carriers deployed in the**22 **pond**

| Gene (log copies) | Carrier Type            | Slope (log copies per day) | P-value    | Lower 95%  | Upper 95%  |
|-------------------|-------------------------|----------------------------|------------|------------|------------|
| 16S rRNA          | Control (C)             | 0.02498187                 | 0.00037337 | 0.01232792 | 0.03763583 |
|                   | Zeolite (Z)             | 0.02400616                 | 9.0911E-05 | 0.01323514 | 0.03477718 |
|                   | Control Pre-seeded (CP) | -0.013528                  | 6.8277E-05 | -0.0190548 | -0.0080012 |
|                   | Zeolite Pre-seeded (ZP) | -0.0246347                 | 2.2802E-06 | -0.0322448 | -0.0170247 |
| Amx               | Control (C)             | 0.02490174                 | 0.00144166 | 0.01046932 | 0.03933416 |
|                   | Zeolite (Z)             | 0.00945516                 | 0.22970758 | -0.0063181 | 0.02522846 |
|                   | Control Pre-seeded (CP) | -0.0192256                 | 8.8217E-05 | -0.0272659 | -0.0111853 |
|                   | Zeolite Pre-seeded (ZP) | -0.0453363                 | 7.4378E-11 | -0.0523933 | -0.0382794 |
| <i>amoA</i>       | Control (C)             | 0.02004466                 | 1.5221E-05 | 0.01217808 | 0.02791123 |
|                   | Zeolite (Z)             | 0.03195017                 | 1.218E-09  | 0.02458565 | 0.03931469 |
|                   | Control Pre-seeded (CP) | -0.0171981                 | 0.00132541 | -0.0267184 | -0.0076777 |
|                   | Zeolite Pre-seeded (ZP) | -0.0408793                 | 2.594E-09  | -0.0488117 | -0.0329469 |

23

24

25
